# Supplementary material for: Antimicrobial Peptides (AMPs): Potential Therapeutic Strategy against Trypanosomiases?
Source: MDPI journal article supplement (doi:10.3390/biom13040599), 2023-03-26
Supplement: s1 [file s1]

Table S1. Antimicrobial peptides with trypanocidal activity against *T. brucei* and *T. cruzi*

| Target organism  | Peptide                          | Origin                                                               | Structure                                | Sequence                                                                                                                                                                         | Mechanism of action               | Reference        |
|------------------|----------------------------------|----------------------------------------------------------------------|------------------------------------------|----------------------------------------------------------------------------------------------------------------------------------------------------------------------------------|-----------------------------------|------------------|
| <i>T. brucei</i> | Attacin                          | Tsetse fly <i>Glossina</i> (Fat body, proventriculus and haemolymph) | $\beta$ -sheet                           | NANVVGGVFAAGNTDGGPATRGAFLAANKDGHGL<br>SLQHSKTDNFGSSLTSSAHAHLFNDKTHKLDANAFH<br>SRTHLDNGFKFDRVGGGLRYDHTVGHGASLTASRIP<br>QLDMNTLGLTGKANLWSSPNRATTDLTGGVSKHF<br>GGPFDGQTNKQIGLGLNSRF | Disruption of the plasma membrane | [16,156,215,216] |
|                  | Defensin                         | Tsetse fly <i>Glossina</i> (Fat body, proventriculus and haemolymph) | Mixed ( $\alpha$ -helix/ $\beta$ -sheet) | VTGELKRDKRVTCTNIGEWVCVAHCNSKSKKSGYCSR<br>GVCYCTN                                                                                                                                 | Disruption of the plasma membrane | [156,157,216]    |
|                  | Diptericin                       | Tsetse fly <i>Glossina</i> (Midgut, fat body and proventriculus)     | $\beta$ -sheet                           | PQSPPAQIKDPKIYASGGGSPKDGYNVNVVDVRKNVWV<br>SQNGRHSIDATGGYSQHLGGPYGNSRPDFRGGASYTYRF                                                                                                | Disruption of the plasma membrane | [16,157,216]     |
|                  | Cecropin                         | Tsetse fly <i>Glossina</i> (haemolymph)                              | $\alpha$ -helix                          | GWLKKIGKKIERVQNTDRTATVKGLEVAQQAANVAAT-<br>VRG                                                                                                                                    | Disruption of the plasma membrane | [16,156,216–218] |
|                  | Stomoxyn                         | <i>Stomoxys calcitrans</i> midgut                                    | $\alpha$ -helix                          | ARGFRKHFNKLVKKVKHTISETAHVAKDTAVIAG-<br>SGAAVVAATG                                                                                                                                | Disruption of the plasma membrane | [16,158,216]     |
|                  | $\beta$ -defensin-1              | Human epithelium                                                     | Mixed ( $\alpha$ -helix/ $\beta$ -sheet) | GLGHRSDHYNCVSSGGQCLYSACPIFTKIQGTCYR-<br>GKAKCCK                                                                                                                                  | Disruption of the plasma membrane | [216,219,220]    |
|                  | $\beta$ -defensin-2              | Human epithelium, keratinocytes                                      |                                          | GIGDPVTCLKSGACHPVFCPRRYKQIGTCGLPGTKCCKKP                                                                                                                                         |                                   | [216,220,221]    |
|                  | Cryptdin-4 ( $\alpha$ -defensin) | Mouse paneth cells                                                   | $\beta$ -sheet                           | LRGLLCYRKGHCKRGEEVRGTCGIRFLYCCPRR                                                                                                                                                | Disruption of the plasma membrane | [216,218]        |

|  |                     |                                                                                            |                    |                                                                              |                                                                                                                              |                      |
|--|---------------------|--------------------------------------------------------------------------------------------|--------------------|------------------------------------------------------------------------------|------------------------------------------------------------------------------------------------------------------------------|----------------------|
|  | LL-37               | Human neutrophils                                                                          | $\alpha$ -helix    | LLGDFFRKSKEKKIVQRIKDFLRNLVPRTES                                              | Disruption of the plasma membrane                                                                                            | [16,216,22<br>2–224] |
|  | SMAP-29             | Ovine myeloids                                                                             | $\alpha$ -helix    | RGLRRLGRKIAHGVKKYGPTVLRIRIAG                                                 | Disruption of the plasma membrane                                                                                            | [16,216,2<br>25,226] |
|  | OaBAC-5-mini        | Ovine myeloids                                                                             | $\alpha$ -helix    | RFRPPIRRPPIRPPFRPPFRPPVR                                                     | Disruption of the plasma membrane                                                                                            | [16,155,22<br>5]     |
|  | BMAP-27             | Bovine neutrophils                                                                         | $\alpha$ -helix    | GRFKRFRKKFKKLFLKLSPIPLHLG                                                    | Disruption of the plasma membrane                                                                                            | [160,216,2<br>27]    |
|  | Indolicidin         | Bovine neutrophils                                                                         | Loop               | ILPWKWPWWPWRRG                                                               | Disruption of the plasma membrane                                                                                            | [216,222,2<br>28]    |
|  | BAC-CN              | Bovine neutrophils                                                                         | $\gamma$ -turn     | RLCRIVVIRVCR                                                                 | Disruption of the plasma membrane                                                                                            | [16,155,22<br>9]     |
|  | VIP                 | Human neurons<br>(Myenteric and sub-<br>mucosal) and nerve<br>terminals in the GI<br>tract | $\alpha$ -helix    | HSDAVFTDNYTRLRKQMAVKKYLSILN                                                  | Disruption of the plasma membrane<br>Alteration intracellular trafficking<br>Disturbance of glycosomes and mito-<br>chondria | [154,216,2<br>30]    |
|  | Amphotycin          | <i>Streptomyces<br/>canus</i>                                                              | Macrocylic<br>ring | FA-DMDDGDG-Dab-VP-Da-Pip                                                     | Inhibits the biosynthesis of the glyco-<br>lipid precursor of GPI                                                            | [166,231,2<br>32]    |
|  | Leucinoastatin<br>A | <i>Paecilomyces<br/>spp.</i>                                                               | $\alpha$ -helix    | MHA-MeP-Dec-HyL-Aib-Aib-L-L-Aib- $\beta$ A-N(CH <sub>3</sub> )               | Ionophore<br>Disruption of the plasma membrane                                                                               | [166,233]            |
|  | Leucinoastatin<br>B |                                                                                            |                    | MHA-MeP-Dec-HyL-Aib-Aib-L-L-Aib- $\beta$ A-NH(CH <sub>3</sub> ) <sub>2</sub> |                                                                                                                              |                      |
|  | Alamethicin         | <i>Paecilomyces</i> spp.                                                                   | $\alpha$ -helix    | Ac-Aib-P-Aib-A-Aib-A-Q-Aib-V-Aib-GL-Aib-PV-Aib-Aib-E-<br>Q-Phol              | Ionophore<br>Disruption of the plasma membrane                                                                               | [167,174,2<br>34]    |

|                 |                  |                                                             |                                             |                                                                                                                                                                                                                          |                                                                                                                                                                  |                      |
|-----------------|------------------|-------------------------------------------------------------|---------------------------------------------|--------------------------------------------------------------------------------------------------------------------------------------------------------------------------------------------------------------------------|------------------------------------------------------------------------------------------------------------------------------------------------------------------|----------------------|
|                 | AS-48            | <i>Enterococcus faecalis</i>                                | $\alpha$ -helix                             | MVKENKFSKIFILMALSFLGLALFSASLQFLPIAHMAKFGI<br>PAAVAGTVLNVVEAGGWVTIVSTAVGSGLSLLAAAGRE<br>SIKAYLKKEIKKKGKRAVIAW                                                                                                             | Formation of multilamellar vesicles<br>and myelin-like structures<br>Alteration of the nuclear envelope                                                          | [169,216,235]        |
|                 | Mellitin         | <i>Apis mellifera</i><br>(Venom glands)                     | $\alpha$ -helix                             | GIGAVLKVLTTGLPALISWIKRKRQQ                                                                                                                                                                                               | Alteration of Ca <sup>2+</sup> homeostasis<br>Disturbance of mitochondria Disorganizing kinetoplast DNA<br>Allteration of metabolism                             | [16,176,178,216,236] |
|                 | SHP-1            | Synthetic                                                   | $\alpha$ -helix                             | SDLGAVISLLLWGRQLFA                                                                                                                                                                                                       | Rigidity of the plasma membrane<br>Loss of cell motility                                                                                                         | [182]                |
|                 | TOP-10           | Synthetic                                                   | $\alpha$ -helix                             | AGYLLGKINLKALAALAKKIL                                                                                                                                                                                                    | Interferes with cellular processes<br>(such as enzymatic activities and nucleic acid synthesis)                                                                  | [180,183]            |
| <i>T. cruzi</i> | Trialysin        | <i>Triatoma infestans</i><br>(Salivary glands)              | Mixed<br>( $\alpha$ -helix/ $\beta$ -sheet) | KIKPGKVLDFGKIVGKVLKQLKKVSAVAVAMKKGA<br>ALLKMGVKISPLKCEEKTCSCVIFKITENSFCTIRF<br>MKNIATYLVVAGEINRKSKEEKLKLGNMPCVNVE-<br>FIGKVCMKGIEGHAKSSSGQANVNFCLGLVAEKFGV<br>GAKLCGIYANKKVRVKISPQLFPGATSLDGDIVKLDDN<br>GEDATTLDDVDEVEID | Disruption of the plasma membrane                                                                                                                                | [20,216]             |
|                 | Def1.3           | <i>Triatoma (Meccus) pallidipennis</i><br>(Salivary glands) | Mixed<br>( $\alpha$ -helix $\beta$ -sheet)  | RATCDLLSFESKWFTPNHAACAAHCILLGNRRGGH<br>CVGTLCHCRK                                                                                                                                                                        | Disruption of the plasma membrane                                                                                                                                | [22,216]             |
|                 | Cecropin A       | <i>Hyalophora cecropia</i>                                  | $\alpha$ -helix                             | KWKLFKKIEKVGQNIRDGIIKAGPAVAVVGQATQIAK                                                                                                                                                                                    | Disruption of the plasma membrane                                                                                                                                | [186,190,216]        |
|                 | Def- $\alpha$ -1 | Human neutrophils                                           | Mixed<br>( $\alpha$ -helix $\beta$ -sheet)  | DIPEVVVSLAWDESLAPKHPGSRKNMACY-<br>CRIPACIAGERRYGTCTYQGRLW                                                                                                                                                                | Disruption of the plasma membrane<br>Cytoplasmic vacuolization<br>Induction of nuclear and mitochondrial DNA fragmentation<br>Breakage of the flagellar membrane | [195,196,216,237]    |

|  |            |                                                                                  |                 |                                    |                                                                                                                                                                                    |           |
|--|------------|----------------------------------------------------------------------------------|-----------------|------------------------------------|------------------------------------------------------------------------------------------------------------------------------------------------------------------------------------|-----------|
|  | VIP        | Human<br>(Myenteric and sub-mucosal neurons and nerve terminals in the GI tract) | $\alpha$ -helix | HSDAVFTDNYTRLRKQMAVKKYLSILN        | Disruption of the plasma membrane                                                                                                                                                  | [104,216] |
|  | Mellitin   | <i>Apis mellifera</i><br>(Venom gland)                                           | $\alpha$ -helix | GIGAVLKVLTTGLPALISWIKRKRQQ         | Disruption of the plasma membrane<br>Kinetoplast and mitochondrial deterioration<br>Alterations of the Ca <sup>2+</sup> homeostasis<br>Activation of different cell death pathways | [177,202] |
|  | Polybia-CP | <i>Polybia paulista</i><br>(Venom gland)                                         | $\alpha$ -helix | ILGTILGLLKSL                       | Induction of ROS<br>Mitochondrial dysfunction<br>Apoptosis-like cell death                                                                                                         | [201,238] |
|  | MP         |                                                                                  |                 | IDWLKLGKVMMDVL                     | Induction of ROS<br>Mitochondrial dysfunction<br>Inhibition of the GAPDH enzyme                                                                                                    | [208,216] |
|  | BatxC      | <i>Bothrops atrox</i><br>(Venom gland)                                           | $\alpha$ -helix | KRFKKFFKKLKNSVKKRVKKFFRKPRVIGVTFPF | Disruption of the plasma membrane<br>Production of ROS                                                                                                                             | [203,216] |
|  | Ctn        | <i>C. durissus terrificus</i><br>(Venom gland)                                   | $\alpha$ -helix | KRFKKFFKKVKKSVKKRLKKIFKKPMVIGVTIPF | Mitochondrial dysfunction                                                                                                                                                          | [204,216] |
|  | DS 01      | <i>Phyllomedusa nordseltina</i><br>(Skin gland)                                  | $\alpha$ -heli  | GLWSTIKNVGKEAAIAAGKAALGAL          | Disruption of the cell membrane                                                                                                                                                    | [105,106] |
|  | DS 04      |                                                                                  |                 | GLWSTIKQKGKEAAIAAKAAGKAALNAASEAL   | Inhibition of synthesis of proteins,                                                                                                                                               |           |
|  | Phyl 7     |                                                                                  |                 | FLSLIPHAINAVSAIAKHF                | DNA and RNA                                                                                                                                                                        |           |
|  | Phyl 8     |                                                                                  |                 | FLSLIPTAINAVSALAKHF                |                                                                                                                                                                                    |           |
|  | Figainin 1 | <i>Boana raniceps</i><br>(Skin gland)                                            | $\alpha$ -helix | FIGTLIPLALGALTCLFK                 | Disruption of the cell membrane                                                                                                                                                    | [211,216] |
|  | Figainin 2 |                                                                                  |                 | FLGAILKIGHALAKTVLPMVTNAFKPKQ       | Inhibition of synthesis of proteins,<br>DNA and RNA                                                                                                                                |           |

|  |            |                                              |                                             |                                                         |                                                                                                                                                    |           |
|--|------------|----------------------------------------------|---------------------------------------------|---------------------------------------------------------|----------------------------------------------------------------------------------------------------------------------------------------------------|-----------|
|  | Tach       | <i>Tachypleus tridentatus</i><br>(Hemocytes) | $\beta$ -sheet                              | KWCFRVCYRGICYRRC                                        | Disruption of the plasma membrane                                                                                                                  | [185,216] |
|  | Hemocyanin | <i>Penaeus monodon</i><br>(Hemolymph)        | Mixed<br>( $\alpha$ -helix/ $\beta$ -sheet) | LVVAVTGDGAADA AVDGLHENTEF-<br>NHYGSHGKYPDNRP HGYPLDRKVP | Disruption of the plasma membrane                                                                                                                  | [103,216] |
|  | Tempz-1    | Synthetic                                    | $\alpha$ -helix                             | FLPLWLWLWRKLK                                           | Chromatin condensation<br>Mitochondrial cristae disorder<br>Kinetoplast disorganization<br>Increase in the number and degeneration of reservosomes | [17]      |
|  | DC 1       | Synthetic                                    | $\alpha$ -helix                             | FALALKALKKALKKLKKALKKAL                                 | Disruption of the plasma membrane                                                                                                                  | [184]     |
|  | DC 2       |                                              |                                             | FAKKLAKKLKKLAKKLAKLALAL                                 |                                                                                                                                                    |           |
|  | DC 3       |                                              |                                             | FARRLARRLRRLARRLARLALAL                                 |                                                                                                                                                    |           |

GI: Gastrointestinal, FA: Fatty acid, Dabe: D-eryr/zro-cr,P-diaminobutyric acid, D-Pip: D-pipecolic, MHA: 4-methyl-2-hexenoic acid, MeP: 4-methylprolin, AHMO: 2-amino-6-hydroxy-4-methyl-8-oxodecanoic acid, HyL: threo- $\beta$ -hydroxyleucine, Aib: 2-aminoisobutyric,  $\beta$ -A:  $\beta$ -alanine, DMPD: N, N-dimethylpropane1,2-diamine, AC: acetyl, Phol: L-phenylalaninol
